# Supplementary material for: Mixed oxides with corundum-type structure obtained from recycling can seals as paint pigments: color stability
Source: publisher site journal article supplement (doi:10.3762/bjnano.14.37), 2023-04-05
Supplement: Additional file 1 [file 2190-4286-14-37-S1.pdf]

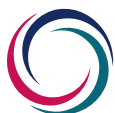

## Supporting Information

for

### **Mixed oxides with corundum-type structure obtained from recycling can seals as paint pigments: color stability**

Dienifer F. L. Horsth, Julia de O. Primo, Nayara Balaba, Fauze J. Anaissi  
and Carla Bittencourt

*Beilstein J. Nanotechnol.* **2023**, *14*, 467–477. [doi:10.3762/bjnano.14.37](https://doi.org/10.3762/bjnano.14.37)

### **Additional experimental data.**

**XRD and SEM of the samples, absorption spectra, reflectance spectra, and colorimetric parameters of the oxides and samples**

## X-ray diffractometry (XRD)

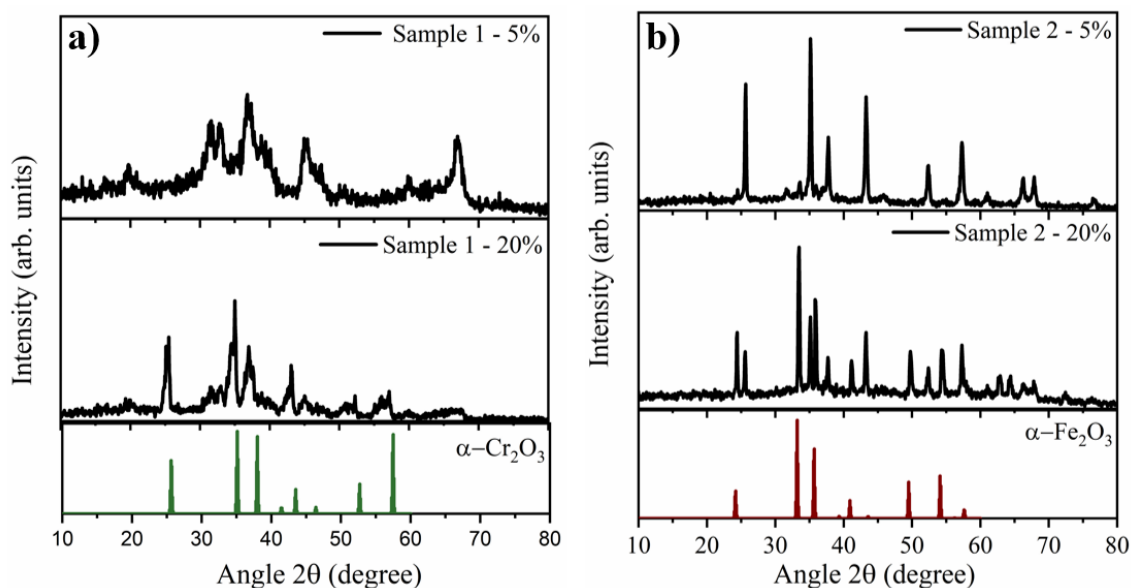

**Figure S1:** XRD of (a) sample 1 - 5% and sample 1 - 20%, showing  $\alpha\text{-Cr}_2\text{O}_3$  patterns, and (b) sample 2 - 5% and sample 2 - 20%, showing  $\alpha\text{-Fe}_2\text{O}_3$  patterns. Both structures are corundum-type with the presence of aluminum oxide.

## Scanning electron microscopy (SEM)

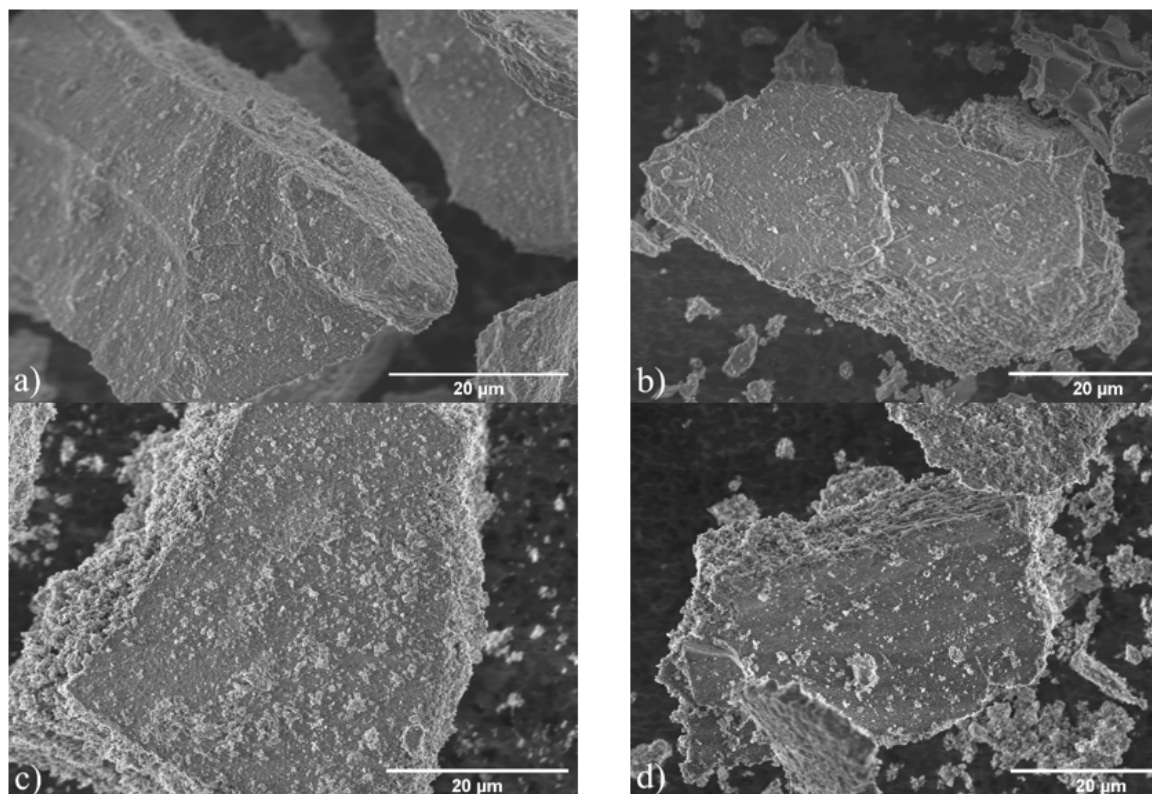

**Figure S2:** SEM of (a) sample 1 - 5%, (b) sample 1 - 20%, (c) sample 2 - 5%, and (d) sample 2 - 20%. All samples presented large particles with a bed structure and grooves on their surface. Samples 2 - 5% and 2 - 20% are composed of small particles, characteristics of  $\alpha\text{-Fe}_2\text{O}_3$ .

### UV-vis absorbance

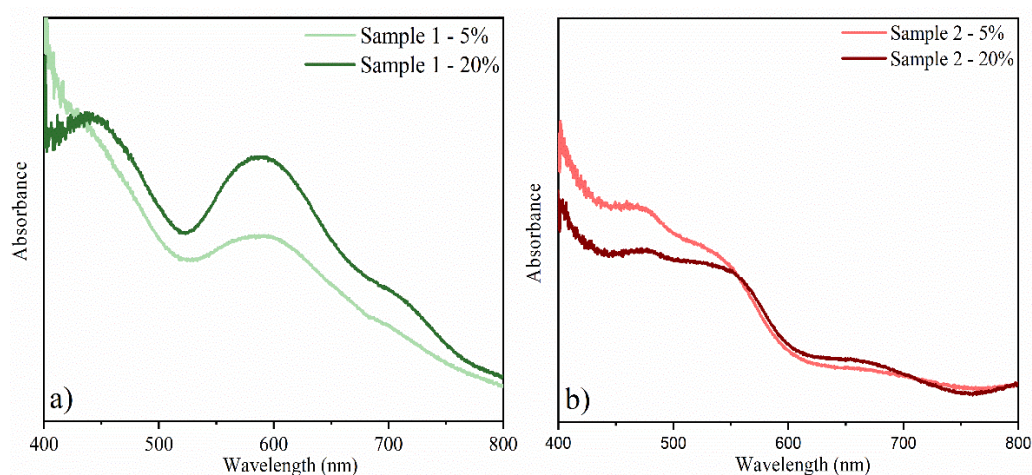

**Figure S3:** Absorption spectra of (a) sample 1 - 5% and sample 1 - 20% and (b) sample 2 - 5% and sample 2 - 20%. Both spectra show transitions observed in an octahedral structure verifying the XRD results.

### UV-vis reflectance:

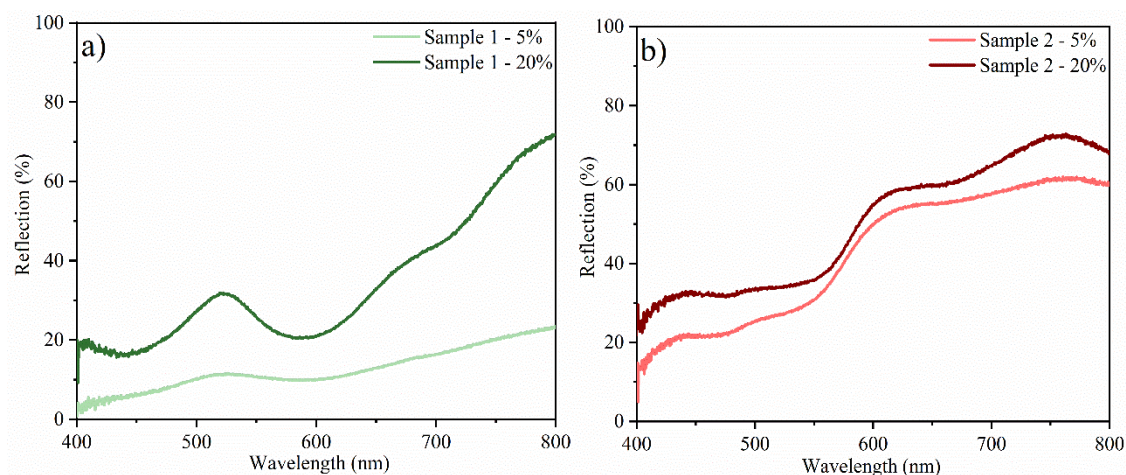

**Figure S4:** Reflectance spectra of (a) sample 1 - 5% and sample 1 - 20% (the band centered at 523 nm verifies the hue of these pigments) and (b) sample 2 - 5% and sample 2 - 20% (the band centered at 618 nm verifies the hue color of these pigments).

## Colorimetry

**Table S1:** Colorimetric parameters of the oxides.

| Sample         | Colorimetric Parameters |       |       |       |       |            | photo                                                                               |
|----------------|-------------------------|-------|-------|-------|-------|------------|-------------------------------------------------------------------------------------|
|                | $L^*$                   | $a^*$ | $b^*$ | $C^*$ | $h^*$ | $\Delta E$ |                                                                                     |
| alumina        | 74.34                   | -0.71 | 9.48  | 9.51  | 94.26 | —          |  |
| sample 1 - 5%  | 38.75                   | 0.49  | 17.73 | 17.73 | 88.43 | 11.24      |  |
| sample 1 - 20% | 32.53                   | -0.35 | 8.40  | 8.41  | 92.36 |            |  |
| sample 2 - 5%  | 44.84                   | 16.01 | 20.90 | 26.33 | 52.55 | 16.76      |  |
| sample 2 - 20% | 33.21                   | 11.47 | 9.72  | 15.03 | 40.27 |            |  |

The total color difference ( $\Delta E$ ) between similar samples shows a strong color difference caused by the amount of coloring ions.

## Color Stability

**Table S2:** Colorimetric parameters of the samples sample 1 - 5%, sample 1 - 20%, sample 2 - 5%, and sample 2 - 20% applied in white commercial paint after 240 hours in acid and alkali environment exposure.

| Environment | Sample                 | Colorimetric Parameters |       |       |       |        |            | photo                                                                                 |
|-------------|------------------------|-------------------------|-------|-------|-------|--------|------------|---------------------------------------------------------------------------------------|
|             |                        | $L^*$                   | $a^*$ | $b^*$ | $C^*$ | $h^*$  | $\Delta E$ |                                                                                       |
| acid        | white paint – 240 h    | 96.76                   | 0.40  | 1.18  | 1.25  | 71.27  | 1.33       |    |
|             | sample 1 - 5% – 240 h  | 90.45                   | -0.74 | 2.74  | 2.84  | 105.12 | 0.71       |    |
|             | sample 1 - 20% – 240 h | 82.71                   | -1.80 | 1.84  | 2.57  | 134.31 | 0.51       |    |
|             | sample 2 - 5% – 240 h  | 86.83                   | 6.94  | 8.08  | 10.65 | 49.37  | 1.09       |    |
|             | sample 2 - 20% – 240 h | 79.95                   | 5.52  | 2.42  | 6.03  | 23.71  | 0.92       |    |
| alkaline    | white paint – 240 h    | 95.64                   | 0.30  | 1.03  | 1.08  | 73.26  | 0.94       |    |
|             | sample 1 - 5% – 240 h  | 89.40                   | -0.87 | 3.37  | 3.49  | 104.50 | 1.27       |   |
|             | sample 1 - 20% – 240 h | 82.52                   | -1.93 | 1.29  | 2.32  | 146.26 | 0.25       |  |
|             | sample 2 - 5% – 240 h  | 85.97                   | 7.29  | 8.93  | 11.53 | 50.83  | 0.91       |  |
|             | sample 2 - 20% – 240 h | 79.06                   | 5.22  | 2.45  | 5.77  | 25.13  | 0.16       |  |

The total color difference ( $\Delta E$ ) indicates that the higher the percentage of coloring ions in the oxide, the more stable its color.
